# Supplementary material
Source: PubMed Central journal article supplement (PMC9789162)
Supplement: NIHMS1830075-supplement-1.pdf [file NIHMS1830075-supplement-1.pdf]

Supplementary Table I. Different Endograft configurations in population

| No. of target vessels           | No. of patients | CME | PME | Celiac Trunk | SMA                           | RRA                           | LRA         |
|---------------------------------|-----------------|-----|-----|--------------|-------------------------------|-------------------------------|-------------|
| <b>4-target vessels (n=184)</b> | 117             | X   | 117 | Fen          | Fen                           | Fen                           | Fen         |
|                                 | 63              | X   | 63  | Scallop      | Fen                           | Fen                           | Fen         |
|                                 | 4               | X   | 4   | Scallop      | Scallop                       | Fen                           | Fen         |
| <b>3-target vessels (n=690)</b> | 326             | 251 | 75  | <b>X</b>     | Fen                           | Fen/Scallop                   | Fen/Scallop |
|                                 | 337             | 335 | 2   | <b>X</b>     | Scallop                       | Fen/Scallop                   | Fen/Scallop |
|                                 | 15              | 12  | 3   | Fen          | 2x Fen/Scallop in SMA/RRA/LRA |                               |             |
|                                 | 8               | 5   | 3   | Scallop      | 2x Fen/Scallop in SMA/RRA/LRA |                               |             |
| <b>2-target vessels (n=443)</b> | 362             | 360 | 2   | <b>X</b>     | <b>X</b>                      | Fen                           | Fen         |
|                                 | 4               | 3   | 1   | <b>X</b>     | <b>X</b>                      | Fen                           | Scallop     |
|                                 | 16              | 16  | 0   | <b>X</b>     | <b>X</b>                      | Scallop                       | Fen         |
|                                 | 6               | 6   | 0   | <b>X</b>     | <b>X</b>                      | Scallop                       | Scallop     |
|                                 | 2               | 2   | 0   | Fen/Scallop  | <b>X</b>                      | Fen/Scallop in either RRA/LRA |             |
|                                 | 45              | 35  | 10  | <b>X</b>     | Fen/Scallop                   | Fen/Scallop in either RRA/LRA |             |
|                                 | 8               | 7   | 1   | Fen/Scallop  | Fen/Scallop                   | <b>X</b>                      | <b>X</b>    |
| <b>1-target vessel (n=169)</b>  | 1               | 1   | 0   | Fen/Scallop  | <b>X</b>                      | <b>X</b>                      | <b>X</b>    |
|                                 | 81              | 79  | 2   | <b>X</b>     | Fen/Scallop                   | <b>X</b>                      | <b>X</b>    |
|                                 | 47              | 35  | 12  | <b>X</b>     | <b>X</b>                      | Fen/Scallop                   | <b>X</b>    |
|                                 | 40              | 39  | 1   | <b>X</b>     | <b>X</b>                      | <b>X</b>                      | Fen/Scallop |

CME = Commercial FEVAR, PME = Physician Modified Endograft, SMA = Superior Mesenteric Artery; RRA = Right Renal Artery; LRA = Left Renal Artery; Fen = Fenestration

Supplementary Table II. Perioperative mortality and in-hospital complications following the use of commercial FEVAR versus physician modified endograft for repair of juxta-/pararenal abdominal aortic aneurysms

|                                                      | <b>PMEG (n=300) vs.<br/>Commercial FEVAR (n=1186)</b> |                                    |                 |
|------------------------------------------------------|-------------------------------------------------------|------------------------------------|-----------------|
|                                                      | <u>Risk-adjusted<sup>¶</sup> Outcomes</u>             |                                    |                 |
|                                                      | <b>Hazard<br/>Ratio</b>                               | <b>95%-Confidence<br/>Interval</b> | <b>p-value</b>  |
| <b>Perioperative Mortality</b>                       | 1.24                                                  | 0.51-2.97                          | NS              |
| <b>3-year Mortality</b>                              | 1.00                                                  | 0.59-1.69                          | .99             |
| <b><u>In-hospital Complications</u></b>              | <b>Odds<br/>Ratio</b>                                 | <b>95%-Confidence<br/>Interval</b> | <b>p-value</b>  |
| <b>Type-IA Endoleaks at Completion<br/>Angiogram</b> | 0.73                                                  | 0.36-1.38                          | .35             |
| <b>Any Complication</b>                              | <b>1.54</b>                                           | <b>1.02-2.31</b>                   | <b>.038</b>     |
| Pulmonary Complications                              | <b>2.86</b>                                           | <b>1.54-5.42</b>                   | <b>&lt;.001</b> |
| Cardiac Complication                                 | 1.24                                                  | 0.59-2.52                          | .52             |
| Bowel Ischemia                                       | 0.93                                                  | 0.34-2.27                          | .87             |
| Stroke                                               | 1.64                                                  | 0.42-6.20                          | .46             |
| Leg Ischemia                                         | 0.81                                                  | 0.25-2.25                          | .70             |
| AKI                                                  | <b>1.65</b>                                           | <b>1.17-2.30</b>                   | <b>.004</b>     |
| Postoperative Dialysis                               | 1.71                                                  | 0.52-5.50                          | .36             |
| Spinal Cord Ischemia                                 | 1.14                                                  | 0.30-3.78                          | .84             |
| <b>Reintervention/Reoperation</b>                    | <b>1.81</b>                                           | <b>1.08-3.03</b>                   | <b>.024</b>     |

<sup>¶</sup>Age, Gender, Race, Diameter, Hypertension, Diabetes, Myocardial Infarction, Congestive Heart Failure (NYHA I/II / NYHA III/IV), Smoking Status, Chronic Obstructive Pulmonary Disease, Obesity, Renal Dysfunction, Anemia, Prior Medication use (Aspirin, P2Y12-inhibitor, Statin, ACE/ARB), Prior Aortic Surgery, Aneurysm Extent (Zone 8/9), Proximal Sealing Level (Supraceliac vs. Infraceliac), Distal Sealing Zone, Low Center volume, Low Physician volume
